# Supplementary material for: Electroconvulsive Therapy Augmentation in Clozapine-Resistant Schizophrenia: A Prospective, Randomized Study
Source: Atypon-hosted journal article supplement (doi:10.1176/appi.ajp.2014.13060787), 2014-12-17
Supplement: appi.ajp.2014.13060787_ds002.pdf [file appi.ajp.2014.13060787_ds002.pdf]

|                       |          | Phase 1<br>non ECT | Phase 1<br>ECT | Phase 1b<br>ECT | Overall p-value for Trt vs Time Interaction |
|-----------------------|----------|--------------------|----------------|-----------------|---------------------------------------------|
| MMSE TOTAL            | Baseline | 22.2 (1.0)         | 22.6 (1.2)     | 22.7 (0.9)      | 0.7819                                      |
|                       | Final    | 23.4 (1.2)         | 23.1 (1.2)     | 22.8 (1.3)      |                                             |
| MODIFIED MMSE         | Baseline | 41.4 (2.8)         | 44.4 (1.7)     | 43.9 (1.4)      | 0.5347                                      |
|                       | Final    | 46.9 (4.4)         | 43.9 (1.7)     | 44.0 (2.3)      |                                             |
| Letter Number CORRE   | Baseline | 6.8 (1.2)          | 9.5 (1.3)      | 7.5 (0.9)       | 0.0613                                      |
|                       | Final    | 8.3 (1.5)          | 6.8 (1.3)      | 6.0 (1.3)       |                                             |
| Letter Number LONG    | Baseline | 3.3 (0.4)          | 4.3 (0.4)      | 3.5 (0.3)       | 0.2599                                      |
|                       | Final    | 3.5 (0.5)          | 3.4 (0.4)      | 3.1 (0.4)       |                                             |
| Trails A TIME         | Baseline | 52.5 (7.0)         | 56.8 (16.6)    | 80.4 (12.1)     | 0.0321                                      |
|                       | Final    | 41.7 (9.1)         | 102.7 (16.4)   | 47.2 (21.0)     |                                             |
| Trails A ERROR        | Baseline | 0.19 (0.13)        | 0.39 (0.10)    | 0.08 (0.06)     | 0.0206                                      |
|                       | Final    | -0.03 (0.20)       | 0.10 (0.10)    | 0.29 (0.10)     |                                             |
| Trails B TIME         | Baseline | 191.6 (22.1)       | 182.1 (21.1)   | 196.3 (17.9)    | 0.9486                                      |
|                       | Final    | 207.6 (30.1)       | 197.4 (21.1)   | 200.6 (28.0)    |                                             |
| Trails B ERROR        | Baseline | 1.2 (0.4)          | 1.5 (0.4)      | 0.9 (0.2)       | 0.3421                                      |
|                       | Final    | 0.6 (0.5)          | 1.1 (0.4)      | 1.3 (0.4)       |                                             |
| Vis. Reproduc. I RAW  | Baseline | 18.0 (2.1)         | 20.1(2.2)      | 20.8 (1.6)      | 0.1212                                      |
|                       | Final    | 23.7 (2.5)         | 20.3 (2.2)     | 22.4 (2.3)      |                                             |
| Vis. Reproduc. II RAW | Baseline | 10.3 (1.7)         | 12.9 (2.2)     | 12.1 (1.5)      | 0.0513                                      |
|                       | Final    | 14.7 (2.1)         | 11.9 (2.2)     | 9.2 (2.3)       |                                             |
| FLUP_4                | Baseline | 8.5 (1.0)          | 10.7 (1.1)     | 8.8 (0.7)       | 0.0398                                      |
|                       | Final    | 10.0 (1.4)         | 7.8 (1.1)      | 5.8 (1.0)       |                                             |
| FLUP_8                | Baseline | 8.3 (0.9)          | 11.1 (0.9)     | 7.3 (0.6)       | 0.0908                                      |
|                       | Final    | 7.9 (1.3)          | 6.8 (0.9)      | 5.4 (0.9)       |                                             |
| FLUP_12               | Baseline | 7.9 (0.8)          | 9.3 (1.0)      | 7.3 (0.7)       | 0.0334                                      |
|                       | Final    | 8.9 (1.0)          | 6.6 (1.0)      | 5.2 (1.0)       |                                             |
| COWATTS               | Baseline | 24.8 (2.3)         | 31.0 (2.7)     | 23.4 (1.8)      | 0.017                                       |
|                       | Final    | 26.8 (3.0)         | 21.3 (2.6)     | 16.2 (2.8)      |                                             |
| COWAT CORRECTED       | Baseline | 28.2 (2.5)         | 34.6 (2.7)     | 26.5 (1.9)      | 0.0384                                      |
|                       | Final    | 30.0 (3.2)         | 24.3 (2.7)     | 19.1 (2.8)      |                                             |
| AVLT TRIAL_1          | Baseline | 3.7 (0.5)          | 3.4 (0.4)      | 3.6 (0.3)       | 0.591                                       |
|                       | Final    | 4.0 (0.7)          | 3.3 (0.4)      | 4.2 (0.5)       |                                             |
| AVLT TRIAL_2          | Baseline | 4.8 (0.4)          | 5.1 (0.5)      | 4.5 (0.3)       | 0.2603                                      |
|                       | Final    | 4.5 (0.5)          | 4.5 (0.3)      | 5.0 (0.5)       |                                             |
| AVLT TRIAL_3          | Baseline | 5.5 (0.6)          | 5.8 (0.6)      | 5.1 (0.4)       | 0.4826                                      |
|                       | Final    | 5.1 (0.7)          | 5.1 (0.6)      | 5.2 (0.4)       |                                             |
| AVLT TRIAL_4          | Baseline | 5.4 (0.6)          | 6.6 (0.7)      | 5.6 (0.4)       | 0.1091                                      |
|                       | Final    | 6.1 (0.6)          | 5.7 (0.7)      | 6.0 (0.5)       |                                             |
| AVLT TRIAL_5          | Baseline | 6.2 (0.7)          | 6.8 (0.7)      | 6.0 (0.5)       | 0.2569                                      |
|                       | Final    | 6.1 (0.9)          | 5.9 (0.7)      | 6.2 (0.6)       |                                             |
| AVLT TRIALB           | Baseline | 3.1 (0.4)          | 3.8 (0.5)      | 3.1 (0.3)       | 0.007                                       |
|                       | Final    | 3.9 (0.4)          | 3.0 (0.5)      | 2.3 (0.4)       |                                             |
| AVLT INTERFER.        | Baseline | 4.3 (0.7)          | 4.8 (0.6)      | 3.9 (0.5)       | 0.2118                                      |
|                       | Final    | 4.7 (0.9)          | 3.5 (0.6)      | 4.0 (0.7)       |                                             |
| AVLT DELAY            | Baseline | 2.8 (0.6)          | 3.3 (0.6)      | 2.7 (0.4)       | 0.238                                       |
|                       | Final    | 3.5 (0.8)          | 2.4 (0.6)      | 2.7 (0.6)       |                                             |

|                   |          |            |            |            |        |
|-------------------|----------|------------|------------|------------|--------|
| AVLT RECOG        | Baseline | 8.1 (0.9)  | 9.2 (1.1)  | 7.5 (0.8)  | 0.6565 |
|                   | Final    | 7.5 (1.1)  | 7.6 (1.0)  | 7.3 (1.2)  |        |
| AVLT ERRORS       | Baseline | 0.9 (0.3)  | 1.3 (0.4)  | 1.0 (0.3)  | 0.1783 |
|                   | Final    | 1.0 (0.4)  | 1.1 (0.4)  | 1.9 (0.4)  |        |
| SEM. FLU. TOT     | Baseline | 26.7 (2.5) | 32.7 (2.9) | 24.1 (2.1) | 0.0087 |
|                   | Final    | 27.9 (3.0) | 22.3 (2.8) | 17.2 (3.2) |        |
| VEG. FLU TOT      | Baseline | 5.7 (0.8)  | 8.5 (1.0)  | 5.6 (0.7)  | 0.0115 |
|                   | Final    | 6.8 (1.0)  | 5.3 (1.0)  | 4.6 (1.0)  |        |
| FRUIT FLU TOT     | Baseline | 9.1 (0.8)  | 10.6 (0.9) | 8.0 (0.6)  | 0.247  |
|                   | Final    | 8.6 (1.1)  | 7.7 (0.8)  | 5.7 (1.0)  |        |
| ANIMAL FLU TOT    | Baseline | 11.7 (1.2) | 13.6 (1.3) | 10.6 (0.9) | 0.0152 |
|                   | Final    | 12.6 (1.5) | 9.2 (1.3)  | 6.9 (1.3)  |        |
| RANDT IMMED 1     | Baseline | 0.9 (0.3)  | 1.7 (0.3)  | 1.1 (0.2)  | 0.4574 |
|                   | Final    | 1.0 (0.5)  | 1.1 (0.3)  | 0.5 (0.3)  |        |
| RANDT IMMED 2     | Baseline | 1.9 (0.4)  | 2.5 (0.4)  | 2.4 (0.3)  | 0.1112 |
|                   | Final    | 2.6 (0.5)  | 2.2 (0.4)  | 1.7 (0.4)  |        |
| RANDT IMMED 3     | Baseline | 2.7 (0.5)  | 3.7 (0.5)  | 3.2 (0.4)  | 0.0358 |
|                   | Final    | 3.5 (0.5)  | 3.1 (0.5)  | 2.9 (0.5)  |        |
| RANDT DELAY_1     | Baseline | 2.3 (0.5)  | 3.8 (0.6)  | 2.7 (0.3)  | 0.231  |
|                   | Final    | 2.6 (0.6)  | 2.6 (0.5)  | 2.0 (0.4)  |        |
| RANDT DELAY_2     | Baseline | 3.5 (0.5)  | 4.3 (0.5)  | 3.7 (0.4)  | 0.0931 |
|                   | Final    | 3.9 (0.6)  | 3.5 (0.5)  | 2.3 (0.6)  |        |
| RANDT DELAY_3     | Baseline | 4.0 (0.5)  | 4.8 (0.5)  | 4.1 (0.4)  | 0.0491 |
|                   | Final    | 4.7 (0.6)  | 3.8 (0.5)  | 2.8 (0.6)  |        |
| RANDT DELAY_4     | Baseline | 4.3 (0.5)  | 4.9 (0.6)  | 4.3 (0.4)  | 0.0865 |
|                   | Final    | 4.7 (0.5)  | 4.0 (0.6)  | 3.1 (0.7)  |        |
| RANDT ACQUISITION | Baseline | 3.3 (0.5)  | 4.9 (0.7)  | 3.8 (0.5)  | 0.3099 |
|                   | Final    | 3.4 (0.6)  | 3.8 (0.7)  | 3.7 (0.7)  |        |
| RANDT WORD REC    | Baseline | 2.5 (0.4)  | 4.0 (0.5)  | 3.0 (0.4)  | 0.1693 |
|                   | Final    | 2.8 (0.5)  | 3.0 (0.5)  | 3.0 (0.6)  |        |
| RANDT DELAY       | Baseline | 1.9 (0.5)  | 2.9 (0.5)  | 2.3 (0.4)  | 0.7105 |
|                   | Final    | 1.7 (0.6)  | 2.5 (0.5)  | 2.5 (0.6)  |        |

| Phase 1                                      | p-value | Phase 1b                                     | p-value |
|----------------------------------------------|---------|----------------------------------------------|---------|
| $\beta_{\text{nonect}} - \beta_{\text{ect}}$ |         | $\beta_{\text{nonect}} - \beta_{\text{ect}}$ |         |
| 0.7 (1.4)                                    | 0.6146  | 1.0 (1.6)                                    | 0.5326  |
| 6.0 (5.3)                                    | 0.2712  | 5.4 (5.5)                                    | 0.3396  |
| 4.2 (1.7)                                    | 0.0227  | 2.9 (1.8)                                    | 0.1148  |
| 0.6 (0.6)                                    | 0.3022  | 1.1 (0.6)                                    | 0.1042  |
| -56.8 (23.0)                                 | 0.0201  | 22.3 (24.8)                                  | 0.3753  |
| 0.08 (0.27)                                  | 0.7851  | -0.44 (0.27)                                 | 0.1114  |
| 0.8 (37.2)                                   | 0.9841  | 11.7 (42.1)                                  | 0.7839  |
| -0.12 (0.76)                                 | 0.8741  | -0.96 (0.73)                                 | 0.2183  |
| 5.5 (2.6)                                    | 0.0515  | 4.1 (2.8)                                    | 0.1561  |
| 5.4 (3.0)                                    | 0.0933  | 7.3 (3.0)                                    | 0.0241  |
| 4.3 (1.9)                                    | 0.0325  | 4.5 (1.7)                                    | 0.0202  |
| 3.8 (1.7)                                    | 0.0373  | 1.6 (1.7)                                    | 0.3638  |
| 3.6 (1.4)                                    | 0.0178  | 3.1 (1.4)                                    | 0.0405  |
| 11.7 (3.9)                                   | 0.0075  | 9.2 (3.8)                                    | 0.0276  |
| 12.0 (4.3)                                   | 0.0158  | 9.2 (4.2)                                    | 0.0495  |
| 0.49 (0.96)                                  | 0.612   | -0.28 (1.01)                                 | 0.7875  |
| 0.2 (0.6)                                    | 0.7111  | -0.8 (0.6)                                   | 0.2537  |
| 0.3 (0.8)                                    | 0.7241  | -0.4 (0.6)                                   | 0.5283  |
| 1.6 (0.7)                                    | 0.0376  | 0.3 (0.5)                                    | 0.4987  |
| 0.9 (0.9)                                    | 0.3606  | -0.4 (0.9)                                   | 0.7099  |
| 1.6 (0.7)                                    | 0.024   | 1.5 (0.5)                                    | 0.0063  |
| 1.7 (1.0)                                    | 0.1539  | 0.3 (1.1)                                    | 0.786   |
| 1.6 (0.9)                                    | 0.1033  | 0.8 (0.9)                                    | 0.3848  |

|            |                   |        |
|------------|-------------------|--------|
| 1.1 (0.5)  | 0.4914 -0.3 (1.6) | 0.837  |
| 0.3 (0.6)  | 0.6394 -0.9 (0.6) | 0.1433 |
| 11.6 (3.5) | 0.0033 8.2 (3.8)  | 0.0442 |
| 4.2 (1.3)  | 0.0034 2.0 (1.2)  | 0.1275 |
| 2.4 (1.4)  | 0.1106 1.8 (1.5)  | 0.2435 |
| 5.3 (1.7)  | 0.006 4.5 (1.8)   | 0.0197 |
| 0.7 (0.6)  | 0.2491 0.6 (0.6)  | 0.2595 |
| 1.0 (0.6)  | 0.1187 1.4 (0.6)  | 0.039  |
| 1.4 (0.5)  | 0.0159 1.2 (0.6)  | 0.0802 |
| 1.4 (0.8)  | 0.0941 0.9 (0.7)  | 0.199  |
| 1.2 (0.7)  | 0.1176 1.9 (0.8)  | 0.0369 |
| 1.7 (0.7)  | 0.0395 2.0 (0.7)  | 0.031  |
| 1.3 (0.7)  | 0.0741 1.6 (0.8)  | 0.0651 |
| 1.2 (0.8)  | 0.1347 0.2 (0.8)  | 0.7874 |
| 0.3 (0.8)  | 0.7331 1.2 (0.6)  | 0.0704 |
| 0.2 (0.7)  | 0.7502 -0.4 (0.8) | 0.6254 |
